# Supplementary material for: Potential Risks of Plant Constituents in Dietary Supplements: Qualitative and Quantitative Analysis of Peganum harmala Seeds
Source: MDPI journal article supplement (doi:10.3390/molecules26051368), 2021-03-04
Supplement: s1 [file s1]

A

First candidate

|                | Sequence                              | Lenght | Start nt | Finish nt |
|----------------|---------------------------------------|--------|----------|-----------|
| Forward primer | TTTTCGA<br>GGACAAA<br>TTCTCACA<br>TTT | 24     | 473      | 497       |
| Reverse primer | AGGGTTT<br>GAACCAG<br>GATTTCTG        | 21     | 540      | 561       |
| Probe          | TATGTGTT<br>AGATGTA<br>CTAATACC<br>CT | 25     | 502      | 527       |

1 actgtatcgc actatgtgtc atttgataac tcaaaaaatc ccttaccctt gttttaaatc  
61 gaattgcaaa tggagggaatt tcaagtatat ttagaactag atagatctcc gcaactgaac  
121 ttctctatacc cacttctttt tcgggagtat atttatgcac ttgctcatga tcatggttta  
181 aatagatcga tgatttcatt ggaaaaatagg gggtatgaca ataaatttag ttactaagt  
241 gtgaaacgtt taattattcg aatgtatcaa cagattcatt tgagtatttc tgctaattat  
301 tctaagcaaa atcaattttt tgggcacaa aataatttgt attctcaaat gatatacagag  
361 ggattttcgag tcattatgga aattccattt tccttaagat tcgtatcttt cttagaagg  
421 aaagaaatag caaaatctca aaatttccaa tcaattcatt caatatttcc ttcttcgag  
481 gacaaattct cacattttaa ttatgtgtta gatgtactaa taccctacc catttgcctc  
541 gaaatcctgg ttcaaacctt tcgctactgg gtaaaagacg cctctctttt acatttatta  
601 cggttctttt tccatgagta tttaatttgg aatggcttta ttactccaaa aaatcttatt  
661 actatttttt caaaaagtaa tccaagatta ttctgtttcc tatataattc tcactctgt  
721 gaatatgaat ctatcttctt ttttatccgt aaccaatcgt ctcatattag atcaacatct  
781 tctggagctc ttcttgagcg aacatattta tatggaaaag tagaattctt tggcgaagcc  
841 gttgctaagt attttcagga catcttatgt ttgttcaagg atcctttctt gcattatgtt  
901 agatatcaag gaaaatctat tctggtctca aaagatagcg ctcttctgat gaataaatgg  
961 aaatattact ttgtcaattt atggcaatgg cattttcatg ttgtgttcga accaggaagg  
1021 gtccatataa atcacctatc caaacattct atcaactttc tgggctatct ttccaatgtg  
1081 caactaaatc cttgggtggg acggactcaa atgttagaaa attcatttct aatagataat  
1141 gttatgaaga agttcgatac aaacgttccc gttattcttc ttacttgagc attgactaag  
1201 ggggggtttt gtaacacatt agggcatccc attagtaagc cgacctgggc cgattcctcc  
1261 gattctcata ttatcgagcg atttgcgtct atatgcagaa atcttttcta ttatcacagt  
1321 ggatcctcaa aaaaaagag ttgttatcga ataaaatata tccttcgctt tcttgtgttt  
1381 aaaagtttgg ttctgtaaca caaaagtact gtacgcgtct ttttgaagg attaggttcg  
1441 gaattctcgg aagaattcct tacggaggaa gagcacgttc tttctttaat ctttcaggaa  
1501 gcttcgttta cttcgcggag gttatataga gggcggattt gttattctga tattatttgt  
1561 ataatgatac tgggtaatca ggatcatgaa tgattgggta tgagaccgag taagttttat  
1621 aaattttctt aaatgggtga tagataaaaa aaattcattt atttcgatta aatgttcagt  
1681 caataaaaaa aataaagggt gatgaactga gtattccgct tttttagtg atttttaggg  
1741 aagaaacaga gttttcgtat ttatacatag ggaaagcgtg gtgcaatgaa aatgcaagc  
1801 acgg

B

Second candidate

|                | Sequence                              | Lenght | Start nt | Finish nt |
|----------------|---------------------------------------|--------|----------|-----------|
| Forward primer | TTTTCGA<br>GGACAAA<br>TTCTCACA<br>TTT | 24     | 473      | 497       |
| Reverse primer | CGAAGGG<br>TTTGAAC<br>CAGGATT         | 21     | 543      | 564       |
| Probe          | TATGTGTT<br>AGATGTA<br>CTAATACC<br>CT | 25     | 509      | 534       |

1 actgtatcgc actatgtgtc atttgataac tcaaaaaatc ccttaccctt gttttaaatc  
61 gaattgcaaa tggagggaatt tcaagtatat ttagaactag atagatctcc gcaactgaac  
121 ttctctatacc cacttctttt tcgggagtat atttatgcac ttgctcatga tcatggttta  
181 aatagatcga tgatttcatt ggaaaaatagg gggtatgaca ataaatttag ttactaagt  
241 gtgaaacgtt taattattcg aatgtatcaa cagattcatt tgagtatttc tgctaattat  
301 tctaagcaaa atcaattttt tgggcacaa aataatttgt attctcaaat gatatacagag  
361 ggattttcgag tcattatgga aattccattt tccttaagat tcgtatcttt cttagaagg  
421 aaagaaatag caaaatctca aaatttccaa tcaattcatt caatatttcc ttcttcgag  
481 gacaaattct cacattttaa ttatgtgtta gatgtactaa taccctacc catttgcctc  
541 gaaatcctgg ttcaaacctt tcgctactgg gtaaaagacg cctctctttt acatttatta  
601 cggttctttt tccatgagta tttaatttgg aatggcttta ttactccaaa aaatcttatt  
661 actatttttt caaaaagtaa tccaagatta ttctgtttcc tatataattc tcactctgt  
721 gaatatgaat ctatcttctt ttttatccgt aaccaatcgt ctcatattag atcaacatct  
781 tctggagctc ttcttgagcg aacatattta tatggaaaag tagaattctt tggcgaagcc  
841 gttgctaagt attttcagga catcttatgt ttgttcaagg atcctttctt gcattatgtt  
901 agatatcaag gaaaatctat tctggtctca aaagatagcg ctcttctgat gaataaatgg  
961 aaatattact ttgtcaattt atggcaatgg cattttcatg ttgtgttcga accaggaagg  
1021 gtccatataa atcacctatc caaacattct atcaactttc tgggctatct ttccaatgtg  
1081 caactaaatc cttgggtggg acggactcaa atgttagaaa attcatttct aatagataat  
1141 gttatgaaga agttcgatac aaacgttccc gttattcttc ttacttgagc attgactaag  
1201 ggggggtttt gtaacacatt agggcatccc attagtaagc cgacctgggc cgattcctcc  
1261 gattctcata ttatcgagcg atttgcgtct atatgcagaa atcttttcta ttatcacagt  
1321 ggatcctcaa aaaaaagag ttgttatcga ataaaatata tccttcgctt tcttgtgttt  
1381 aaaagtttgg ttctgtaaca caaaagtact gtacgcgtct ttttgaagg attaggttcg  
1441 gaattctcgg aagaattcct tacggaggaa gagcacgttc tttctttaat ctttcaggaa  
1501 gcttcgttta cttcgcggag gttatataga gggcggattt gttattctga tattatttgt  
1561 ataatgatac tgggtaatca ggatcatgaa tgattgggta tgagaccgag taagttttat  
1621 aaattttctt aaatgggtga tagataaaaa aaattcattt atttcgatta aatgttcagt  
1681 caataaaaaa aataaagggt gatgaactga gtattccgct tttttagtg atttttaggg  
1741 aagaaacaga gttttcgtat ttatacatag ggaaagcgtg gtgcaatgaa aatgcaagc  
1801 acgg

C

Third candidate

|                | Sequence                              | Lenght | Start nt | Finish nt |
|----------------|---------------------------------------|--------|----------|-----------|
| Forward primer | TGTGGTC<br>GCAACCA<br>GGAA            | 18     | 1010     | 1018      |
| Reverse primer | CCCAAGG<br>ATTAGTT<br>GCACATT<br>G    | 23     | 1074     | 1097      |
| Probe          | TCCATATA<br>AATCACCT<br>ATCCAAA<br>CA | 25     | 1022     | 1047      |

1 actgtatcgc actatgtgtc atttgataac tcaaaaaatc ccttaccctt gttttaaatc  
61 gaattgcaaa tggagggaatt tcaagtatat ttagaactag atagatctcc gcaactgaac  
121 ttctctatacc cacttctttt tcgggagtat atttatgcac ttgctcatga tcatggttta  
181 aatagatcga tgatttcatt ggaaaaatagg gggtatgaca ataaatttag ttactaagt  
241 gtgaaacgtt taattattcg aatgtatcaa cagattcatt tgagtatttc tgctaattat  
301 tctaagcaaa atcaattttt tgggcacaa aataatttgt attctcaaat gatatacagag  
361 ggattttcgag tcattatgga aattccattt tccttaagat tcgtatcttt cttagaagg  
421 aaagaaatag caaaatctca aaatttccaa tcaattcatt caatatttcc ttcttcgag  
481 gacaaattct cacattttaa ttatgtgtta gatgtactaa taccctacc catttgcctc  
541 gaaatcctgg ttcaaacctt tcgctactgg gtaaaagacg cctctctttt acatttatta  
601 cggttctttt tccatgagta tttaatttgg aatggcttta ttactccaaa aaatcttatt  
661 actatttttt caaaaagtaa tccaagatta ttctgtttcc tatataattc tcactctgt  
721 gaatatgaat ctatcttctt ttttatccgt aaccaatcgt ctcatattag atcaacatct  
781 tctggagctc ttcttgagcg aacatattta tatggaaaag tagaattctt tggcgaagcc  
841 gttgctaagt attttcagga catcttatgt ttgttcaagg atcctttctt gcattatgtt  
901 agatatcaag gaaaatctat tctggtctca aaagatagcg ctcttctgat gaataaatgg  
961 aaatattact ttgtcaattt atggcaatgg cattttcatg ttgtgttcga accaggaagg  
1021 gtccatataa atcacctatc caaacattct atcaactttc tgggctatct ttccaatgtg  
1081 caactaaatc cttgggtggg acggactcaa atgttagaaa attcatttct aatagataat  
1141 gttatgaaga agttcgatac aaacgttccc gttattcttc ttacttgagc attgactaag  
1201 ggggggtttt gtaacacatt agggcatccc attagtaagc cgacctgggc cgattcctcc  
1261 gattctcata ttatcgagcg atttgcgtct atatgcagaa atcttttcta ttatcacagt  
1321 ggatcctcaa aaaaaagag ttgttatcga ataaaatata tccttcgctt tcttgtgttt  
1381 aaaagtttgg ttctgtaaca caaaagtact gtacgcgtct ttttgaagg attaggttcg  
1441 gaattctcgg aagaattcct tacggaggaa gagcacgttc tttctttaat ctttcaggaa  
1501 gcttcgttta cttcgcggag gttatataga gggcggattt gttattctga tattatttgt  
1561 ataatgatac tgggtaatca ggatcatgaa tgattgggta tgagaccgag taagttttat  
1621 aaattttctt aaatgggtga tagataaaaa aaattcattt atttcgatta aatgttcagt  
1681 caataaaaaa aataaagggt gatgaactga gtattccgct tttttagtg atttttaggg  
1741 aagaaacaga gttttcgtat ttatacatag ggaaagcgtg gtgcaatgaa aatgcaagc  
1801 acgg

## Identification of species-specific *matk* region

Figure S1. Three candidates amplicons for *Pgh matk* detection. The forward and reverse primers are coloured in blue, while the FAM-TAMRA probe is marked in red. The chosen amplicon is described in figure S1 C.
